# Supplementary material for: The solvent-free and aerobic oxidation of benzyl alcohol catalyzed by Pd supported on carbon nitride/CeO2 composites
Source: Royal Society of Chemistry journal article supplement (doi:10.1039/d2nj00638c), 2022-01-01
Supplement: d2nj00638c1.pdf [file d2nj00638c1.pdf]

## Solvent-free and aerobic oxidation of benzyl alcohol catalyzed by Pd supported on carbon nitride /CeO<sub>2</sub> composites

Xin-Tong Yi, Chun-Yuan Li, Fei Wang, Jie Xu \*, Bing Xue \*\*

*Jiangsu Key Laboratory of Advanced Catalytic Materials and Technology, School of  
Petrochemical Engineering, Changzhou University, Gehu Middle Road 21,  
Changzhou, Jiangsu 213164, PR China*

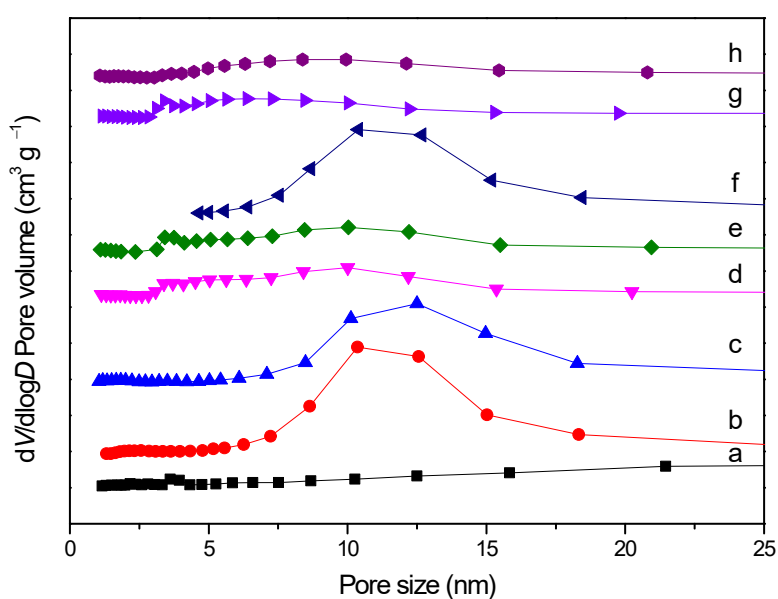

**Fig. S1** Pore size distribution eg-C<sub>3</sub>N<sub>4</sub> (a), CeO<sub>2</sub> (b), CN-1.0/CeO<sub>2</sub> (c), 1Pd/CN-1.0/CeO<sub>2</sub> (d), 2Pd/CN-1.0/CeO<sub>2</sub> (e), 3Pd/CN-1.0/CeO<sub>2</sub> (f), 4Pd/CN-1.0/CeO<sub>2</sub> (g), and 3Pd/CN-1.0/CeO<sub>2</sub>-R (h)

\* Corresponding author. Tel.: +86-519-86330135; E-mail: [shine6832@163.com](mailto:shine6832@163.com) (J. Xu)

\*\* Corresponding author. Tel.: +86-519-86330135; E-mail: [xuebing\\_cn@163.com](mailto:xuebing_cn@163.com) (B. Xue)

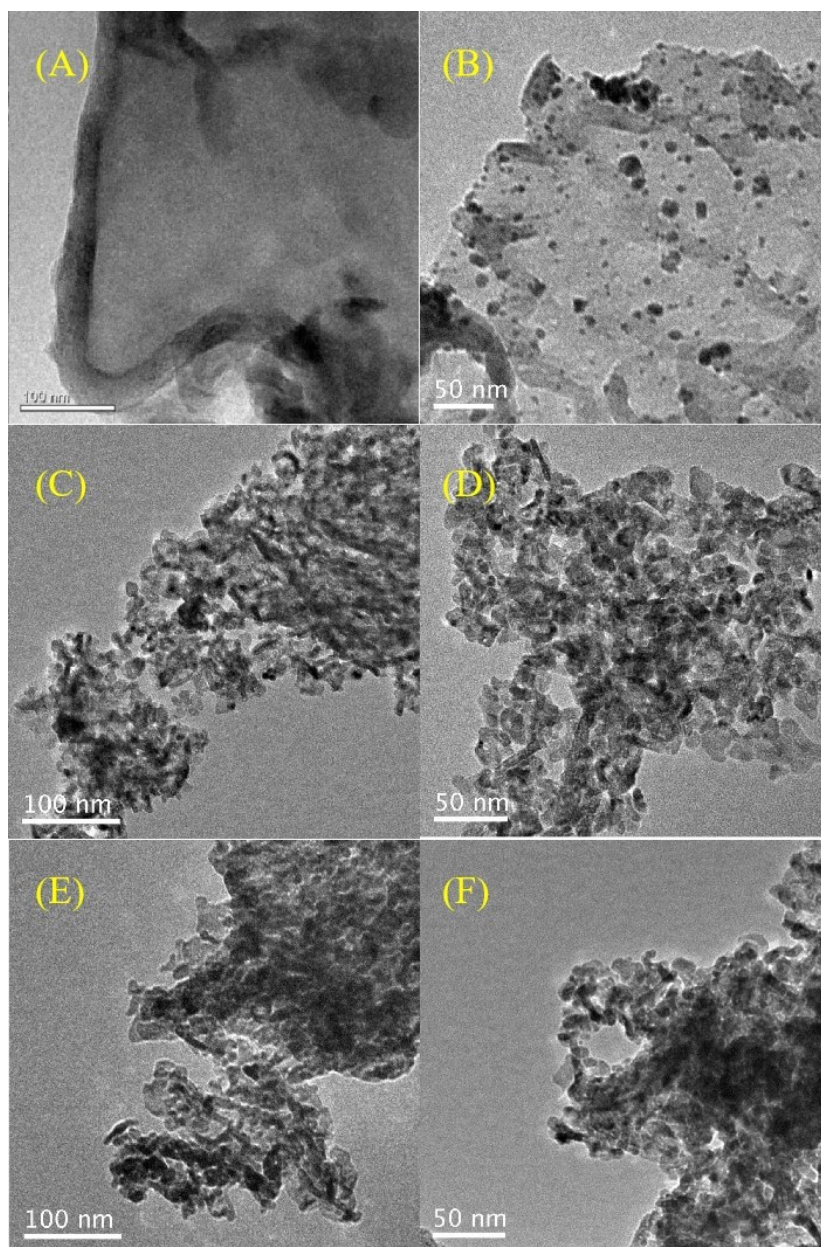

**Fig. S2** TEM images of eg-C<sub>3</sub>N<sub>4</sub> (A), CeO<sub>2</sub> (B), CN-1.0/CeO<sub>2</sub> (C), 3Pd/eg-C<sub>3</sub>N<sub>4</sub> (D), 3Pd/CeO<sub>2</sub> (E), and 3Pd/CN-1.0/CeO<sub>2</sub> (F) materials.

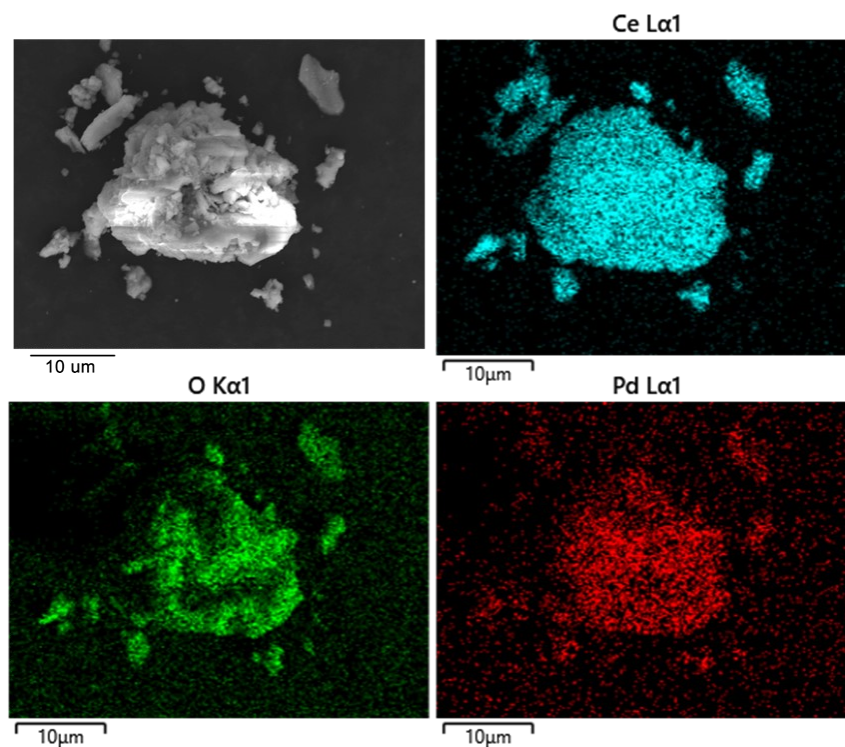

**Fig. S3** SEM and EDX-mapping images of 3Pd/CeO<sub>2</sub>.

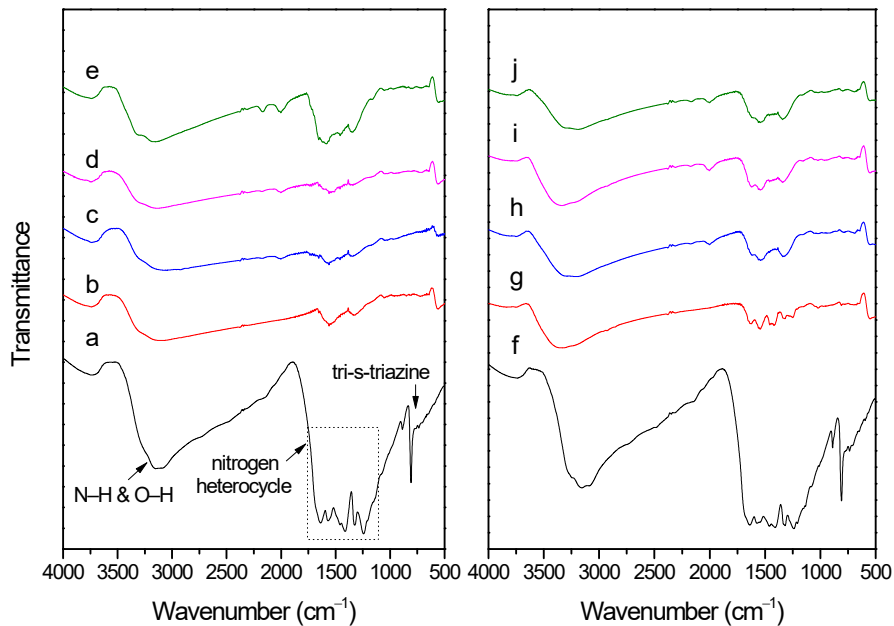

**Fig. S4** FT-IR spectra of eg-C<sub>3</sub>N<sub>4</sub> (a), CeO<sub>2</sub> (b), CN-0.8/CeO<sub>2</sub> (c), CN-1.0/CeO<sub>2</sub> (d), CN-1.2/CeO<sub>2</sub> (e), 3Pd/eg-C<sub>3</sub>N<sub>4</sub> (f), 3Pd/CeO<sub>2</sub> (g), 3Pd/CN-0.8/CeO<sub>2</sub> (h), 3Pd/CN-1.0/CeO<sub>2</sub> (i), and 3Pd/CN-1.2/CeO<sub>2</sub> (j) materials.

**Table S1** Attribution of Ce cations of Ce 3d spectra.

| Peak No. | B.E. (eV) | Signal   | Ce cation        |
|----------|-----------|----------|------------------|
| 0        | 879.3     | $\nu_0$  | Ce <sup>3+</sup> |
| 1        | 881.9     | $\nu$    | Ce <sup>4+</sup> |
| 2        | 884.3     | $\nu'$   | Ce <sup>3+</sup> |
| 3        | 888.5     | $\nu''$  | Ce <sup>4+</sup> |
| 4        | 897.9     | $\nu'''$ | Ce <sup>4+</sup> |
| 5        | 900.6     | $u$      | Ce <sup>4+</sup> |
| 6        | 902.8     | $u'$     | Ce <sup>3+</sup> |
| 7        | 907.1     | $u''$    | Ce <sup>4+</sup> |
| 8        | 896.2     | $u_0$    | Ce <sup>3+</sup> |
| 9        | 916.3     | $u'''$   | Ce <sup>4+</sup> |
